# Supplementary material for: Gait and Lower Limb Observation of Paediatrics (GALLOP): development of a consensus based paediatric podiatry and physiotherapy standardised recording proforma
Source: J Foot Ankle Res. 2016 Mar 3;9:8. doi: 10.1186/s13047-016-0139-4 (PMC4778335; doi:10.1186/s13047-016-0139-4)
Supplement: Additional file 3: — GALLOP- Round 3. (PDF 251 kb) [file 13047_2016_139_MOESM3_ESM.pdf]

## Supplementary File 3 - GALLOP – Round three.

---

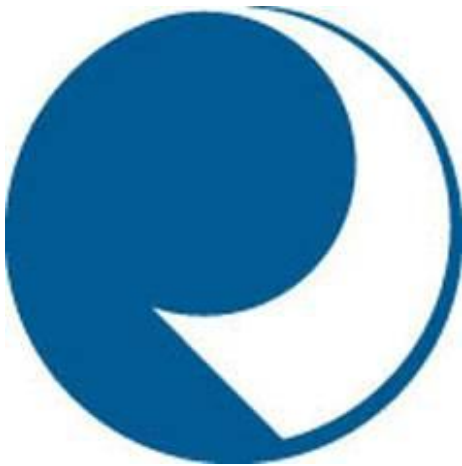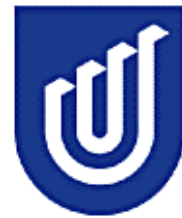

University of  
South Australia

### GALLOP

Thank you for participating in this research.

This project aims to develop a **gait and lower limb assessment tool** that can be used to gain consistency in the type of questioning and assessment that is used with children during an initial assessment (or screen). Many comments have been made about some tests being used based on responses. The primary aim of the GALLOP is to guide the generalist through the minimal or required assessment of a paediatric gait and lower limb concern. We recognise other tests may be included if a negative result is obtained. As the expert panel, your opinion is important on if these additional tests should be included on this assessment.

To do this we are gathering your expertise and agreement during 3-4 rounds of questions therefore we are almost there!

To assist you in your responses thus far, we have also emailed you your responses from round 2.

Your responses are confidential and will only be known by the research team.

The survey should take under 10 minutes to complete.  
You will have the chance at the end to make any comments if you wish.

If you have any questions please contact Simone Cranage ([scrantage@phcn.vic.gov.au](mailto:scrantage@phcn.vic.gov.au)) Cylie Williams ([cyliewilliams@phcn.vic.gov.au](mailto:cyliewilliams@phcn.vic.gov.au)) or Helen Banwell ([HelenBanwell@unisa.edu.au](mailto:HelenBanwell@unisa.edu.au))

For the following questions, we have provided the statement where 70% of consensus (**Round 1**) and agreement (**Round 2**) was achieved. During round 2, there were themes where less than 50% of participants agreed and these have been deleted and not displayed within this round (**Round 3**).

Where a theme had 51-69% of agreement, we ask you to again read the statements that have been produced through the first two rounds and then respond with your agreement of whether the theme of question or measure should be included.

Q1. What is your participant number?

### 1. Pre and post natal history

Based on the responses, consensus and agreement was achieved on the following themes (70% of people identified these themes).

Therefore the pre and post natal history questions that the parent/caregiver should be asked is:

1. Were there any complications during pregnancy? (Prompts: Health of the mother, use of medications)

Yes      No

List: \_\_\_\_\_

2. What was the term of the pregnancy? \_\_\_\_\_ wks?

3. How was the baby delivered    Vaginal    Caesarean

4. Any any post-natal complications during or post delivery (Prompts: Resuscitations, NICU, Special Care

Nursery, congenital abnormalities, medications, general health)

Yes      No

List: \_\_\_\_\_

5. Was the baby in a breech position? Yes      No

6. What was the birth weight \_\_\_\_\_

7. Was assistance required during labour Yes    (forceps/ventouse)    No

8. What was the APGAR score at: 1 minute \_\_\_\_\_ 5 minutes \_\_\_\_\_

9. Where any other medical professionals involved in the care of the baby at birth or within the first 14 days?

Yes      (Birth    Within 14 days)      No

10. Is there a family history of foot or leg problems

Yes      No

List: \_\_\_\_\_

The following theme achieved agreement of 51-69% of participants. Please rate on the following scale your opinion of whether this theme should be included considering the current themes that consensus and agreement have been achieved on:

|        | Strongly Disagree     | Disagree              | Neutral               | Agree                 | Strongly Agree        |
|--------|-----------------------|-----------------------|-----------------------|-----------------------|-----------------------|
| Labour | <input type="radio"/> |

## 2. Developmental milestones/history

Based on the responses, consensus and agreement was achieved on the following themes (70% of people identified these themes).

Therefore the proposed developmental milestones/history questions that the parent/caregiver should be asked are:

Age of Sitting \_\_\_\_\_ months

Age of Crawling \_\_\_\_\_ months Type of crawl \_\_\_\_\_

Age of Walking \_\_\_\_\_ months Running \_\_\_\_\_ years

Age of beginning to Jump \_\_\_\_\_

The following themes achieved agreement of 51-69% of participants. Please rate on the following scale your opinion of whether these themes should be included considering the current themes that consensus and agreement have been achieved on:

|                                 | Strongly Disagree     | Disagree              | Neutral               | Agree                 | Strongly Agree        |
|---------------------------------|-----------------------|-----------------------|-----------------------|-----------------------|-----------------------|
| Age of pull to stand            | <input type="radio"/> |
| Age of beginning to cruise      | <input type="radio"/> |
| Age of beginning to hop         | <input type="radio"/> |
| Age of walking up/down stairs   | <input type="radio"/> |
| Age of beginning to kick a ball | <input type="radio"/> |

## 3. Other history questions

No consensus items were achieved in Round 1. Agreement was achieved (70% of participants agreed) in Round 2 on the following themes. Therefore the proposed additional history questions that the parent caregiver should be asked are:

1. What is the medical history of the child \_\_\_\_\_

2. Has there been any previous treatment of the feet or lower limbs (Prompt: interventions, orthotics, AFO's)

Yes No

List: \_\_\_\_\_

3. Is there pain associated with the complaint (Prompt: Faces Pain Scale)

Yes No

List: \_\_\_\_\_

4. What is the typical footwear worn by the child \_\_\_\_\_

5. What is the child's recreational/sport activities or social activities \_\_\_\_\_

6. Has there be any observed sensory concerns (Prompt: surfaces/textures) \_\_\_\_\_

7. What is the parental goals of assessment and/or treatment \_\_\_\_\_

8. What is the child's primary sitting position at play \_\_\_\_\_

9. What is the child's primary sleeping position \_\_\_\_\_

**The following theme achieved agreement of 51-69% of participants. Please rate on the following scale your opinion of whether this theme should be included considering the current themes that consensus and agreement has been achieved on:**

|               | Strongly Disagree     | Disagree              | Neutral               | Agree                 | Strongly Agree        |
|---------------|-----------------------|-----------------------|-----------------------|-----------------------|-----------------------|
| Height/weight | <input type="radio"/> |

#### 4. Hip Assessment

Based on the responses, consensus was achieved on the following themes (70% of people identified the following assessments used when assessing hip range of movement and the preferred measurement method). Therefore the following hip assessments to be incorporated into the GALLOP assessment are:

Internal/external rotation (knee flexed and/or extended) Left \_\_\_\_\_ Right \_\_\_\_\_

Thomas test (modified thomas test) Left \_\_\_\_\_ Right \_\_\_\_\_

Hip abduction Left \_\_\_\_\_ Right \_\_\_\_\_

Hip adduction Left \_\_\_\_\_ Right \_\_\_\_\_

Preferred measurement methods: Goniometer

**The following theme achieved agreement of 51-69% of participants. Please rate on the following scale your opinion of whether this theme should be included considering the current themes that consensus has been achieved on:**

|                    | Strongly Disagree     | Disagree              | Neutral               | Agree                 | Strongly Agree        |
|--------------------|-----------------------|-----------------------|-----------------------|-----------------------|-----------------------|
| Quad ROM/tightness | <input type="radio"/> |

## 5. Hamstring Assessment

Based on the responses, consensus was achieved on the following themes (70% of people identified the following assessments used when assessing hip range of movement and the preferred measurement method). Therefore the following hip assessment and method of measurement to be incorporated into the GALLOP assessment is:

Popliteal angle: Left \_\_\_\_\_ Right \_\_\_\_\_  
Method: Angle finder

No further responses are required

## 6. Leg Length Assessment

No consensus was achieved in Round 1, however agreement was achieved (70% of participants agreed) in Round 2 on the following statement

1. Observation (frontal plane pelvic/shoulder tilt, scoliosis check, knee creases, head tilt, foot posture, gait)

**The following themes achieved agreement of 51-69% of participants. Please rate on the following scale your opinion of whether these themes should be included considering the current themes that consensus and agreement have been achieved on:**

|                              | Strongly Disagree     | Disagree              | Neutral               | Agree                 | Strongly Agree        |
|------------------------------|-----------------------|-----------------------|-----------------------|-----------------------|-----------------------|
| ASIS-MM (Supine or standing) | <input type="radio"/> |
| Galleazi                     | <input type="radio"/> |

## 7. Leg Length method of measurement

Based on the previous responses, no consensus was achieved in Round 1, however agreement was achieved (70% of participants agreed) in Round two on the following methods of measurement.

1. Tape measure
2. Palpation
3. Eyeball

No further responses are required

## 8. Rotational Profile

Based on the responses, consensus and agreement was achieved on the following themes (70% of people identified the following methods and tools when assessing rotational profile of the upper and lower leg). Therefore the following assessments to be incorporated into the GALLOP are:

1. Internal Hip ROM (hip flexed/extended, knee flexed/extended) Left \_\_\_\_\_  
Right \_\_\_\_\_
2. External Hip ROM (hip flexed/extended, knee flexed/extended) Left \_\_\_\_\_ Right \_\_\_\_\_
3. Thigh foot angle (tibial torsion) Left \_\_\_\_\_ Right \_\_\_\_\_
4. Other (lumbar spine curve, shoulder symmetry, ASIS, knee position, metatarsus adductus)

The following themes achieved agreement of 51-69% of participants. Please rate on the following scale your opinion of whether these themes should be included considering the current themes that consensus and agreement have been achieved on:

|                                          | Strongly Disagree     | Disagree              | Neutral               | Agree                 | Strongly Agree        |
|------------------------------------------|-----------------------|-----------------------|-----------------------|-----------------------|-----------------------|
| Ryder's Test                             | <input type="radio"/> |
| Genicular rotation                       | <input type="radio"/> |
| Trans-malleolar angle/malleolar position | <input type="radio"/> |

## 9. Rotational profile method of measurement.

Based on the responses, no consensus was achieved in Round 1, however agreement was achieved (70% of participants agreed) in Round 2 on the following method of measurement.

1. Goniometer

The following method of measurement achieved agreement of 51-69% of participants. Please rate on the following scale your opinion of whether this method should be included considering the current method that agreement has been achieved on:

|         | Strongly Disagree     | Disagree              | Neutral               | Agree                 | Strongly Agree        |
|---------|-----------------------|-----------------------|-----------------------|-----------------------|-----------------------|
| Eyeball | <input type="radio"/> |

## 10. Ankle range of movement

Based on the responses, consensus and agreement was achieved on the following themes (70% of people identified the following assessments used when assessing ankle range of movement). Therefore the following assessments to be incorporated into the GALLOP are:

1. Non weight-bearing ankle dorsiflexion (knee extended): Left \_\_\_\_\_ Right \_\_\_\_\_
2. Non weight-bearing ankle dorsiflexion (knee flexed): Left \_\_\_\_\_ Right \_\_\_\_\_
3. Weight-bearing lunge test (knee flexed, knee extended) Left \_\_\_\_\_ Right \_\_\_\_\_
4. Able to squat Yes \_\_\_\_\_ No \_\_\_\_\_ N/A
5. Able to walk on toes Yes \_\_\_\_\_ No \_\_\_\_\_ N/A
6. Able to heel walk Yes \_\_\_\_\_ No \_\_\_\_\_ N/A

No further responses are required

## 11. Ankle range of movement method of measurement

Based on the responses, no consensus was achieved in Round 1, however agreement was achieved (70% of participants agreed) in Round two on the following method:

1. Goniometer

The following methods of measurement achieved agreement of 51-69% of participants. Please rate on the following scale your opinion of whether these should be included considering the current method that agreement has been achieved on:

|                      | Strongly Disagree     | Disagree              | Neutral               | Agree                 | Strongly Agree        |
|----------------------|-----------------------|-----------------------|-----------------------|-----------------------|-----------------------|
| Digital inclinometer | <input type="radio"/> |
| Eyeball measurement  | <input type="radio"/> |

## 12. Presence of genu varum/genu valgum

Based on the responses, consensus and agreement was achieved on the following themes (70% of people identified the following assessments used measuring the presence of genu varum/genu valgum. Therefore the following assessments to be incorporated into the GALLOP are:

1. Intercondylar distance (WB) \_\_\_\_\_ cm
2. Intermalleolar distance (WB) \_\_\_\_\_ cm

Method of measurement

1. Use of a tape measure/ruler

**The following theme achieved agreement of 51-69% of participants. Please rate on the following scale your opinion of whether these themes should be included considering the current themes that consensus and agreement have been achieved on:**

|                                  | Strongly Disagree     | Disagree              | Neutral               | Agree                 | Strongly Agree        |
|----------------------------------|-----------------------|-----------------------|-----------------------|-----------------------|-----------------------|
| Intercondylar distance (non-WB)  | <input type="radio"/> |
| Intermalleolar distance (non-WB) | <input type="radio"/> |

### 13. Foot Posture

Based on the responses, consensus and agreement was achieved on the following themes (70% of people identified the following assessments used when assessing foot posture). Therefore the following assessments to be incorporated into the GALLOP are:

1. FPI-6 Left \_\_\_\_\_ Right \_\_\_\_\_
2. Hubscher maneuver (Jack's test)  
Left Positive/Negative Right Positive/Negative
3. Subtalar joint axis  
Left Medial/Typical/Lateral Right Medial/Typical/Lateral
4. Subtalar joint ROM  
Left Restricted/Typical/Hypermobile Right Restricted/Typical/Hypermobile
5. Forefoot to rearfoot relationship  
\_\_\_\_\_
6. Midtarsal joint non weightbearing ROM  
Left Restricted/Typical/Hypermobile Right Restricted/Typical/Hypermobile
5. 1st MPJ Non weightbearing ROM  
Left Restricted/Typical/Hypermobile Right Restricted/Typical/Hypermobile
- 6.. Ability to stand on tip toes  
Left Yes/No/NA Right Yes/No/NA

7. Does the rearfoot resupinate while on tiptoes  
Left Yes/No/N/A Right Yes/No/N/A

Method of measurement: Eyeball

**The following themes achieved agreement of 51-69% of participants. Please rate on the following scale your opinion of whether these themes should be included considering the current themes that consensus and agreement have been achieved on:**

|                                   | Strongly Disagree     | Disagree              | Neutral               | Agree                 | Strongly Agree        |
|-----------------------------------|-----------------------|-----------------------|-----------------------|-----------------------|-----------------------|
| Resting Calcaneal Stance Position | <input type="radio"/> |
| Supination resistance             | <input type="radio"/> |

#### 14. Gross motor ability/balance

Based on the responses, consensus and agreement was achieved on the following themes (70% of people identified the following assessments used when measuring gross motor ability and/or balance). Therefore the following assessments to be incorporated into the GALLOP are:

##### Observations of achievement:

1. Running Yes/No/N/A Observation: \_\_\_\_\_
2. Jumping Yes/No/N/A Observation: \_\_\_\_\_
3. Skipping Yes/No/N/A Observation: \_\_\_\_\_
4. Hopping Yes/No/N/A Observation: \_\_\_\_\_
5. Single leg stance (eyes open, timed) Left \_\_\_\_\_ Right \_\_\_\_\_
6. Single leg stance (eyes closed, timed) Left \_\_\_\_\_ Right \_\_\_\_\_
7. Ability to go up/down stairs Yes/No/N/A Observation: \_\_\_\_\_
8. Other functional tasks (throwing, catching, kicking a ball, animal walks, sport specific activities)
12. Other observations (fatigue, agility, maturity of pattern, coordination of movements, symmetry, strength)
13. Use of standardised assessment (Himat, BOT-2, Berg balance scale, AIMS, Peabody, ASQ etc.
14. Presence of reciprocal arm swing Yes/No/N/A Observation: \_\_\_\_\_
15. Quality of body movement (symmetry, coordination) Observation: \_\_\_\_\_

**The following themes achieved agreement of 51-69% of participants. Please rate on the following scale your opinion of whether these themes should be included considering the current themes that consensus and agreement have been achieved on:**

|                  | Strongly Disagree     | Disagree              | Neutral               | Agree                 | Strongly Agree        |
|------------------|-----------------------|-----------------------|-----------------------|-----------------------|-----------------------|
| Climbing ability | <input type="radio"/> |
| Balance beam     | <input type="radio"/> |

## 15. Reflexes

Based on the responses, consensus was achieved on the following themes (70% of people identified the following reflexes tested in the lower limb. Therefore the reflex tests to be incorporated into the GALLOP are:

1. Patella (knee jerk, quadriceps) reflex
2. Achilles (ankle jerk, gastrocnemius) reflex
3. Plantar reflex (up or down going)

No further responses are required

16. Based on the responses, consensus was achieved (70% of people identified the following preferred grading method of responses) on the following scale:

- 0: Absent reflex
- 1+: trace, or seen only with reinforcement
- 2+: normal
- 3+: brisk
- 4+: nonsustained clonus (i.e., repetitive vibratory movements)
- 5+ sustained clonus

No further responses are required.

## 17. Neurological other

Based on the responses, no consensus was achieved in Round 1, however agreement was achieved (70% of participants agreed) in round Two on the following themes. Therefore the follow assessments to be included are:

1. Muscle tone (passive, active, spasticity, rigidity)
2. Presence of a catch (R1/R2) Site: \_\_\_\_\_
3. Presence of a clonus Site: \_\_\_\_\_
4. Gower's sign Yes/No
5. Dorsiflexion strength (Grading 0-5) Left Right
6. Plantarflexion strength (Grading 0-5) Left Right
7. Inversion strength (Grading 0-5) Left Right
8. Eversion strength (Grading 0-5) Left Right

The following theme achieved agreement of 51-69% of participants. Please rate on the following scale your opinion of whether this theme should be included considering the current themes that agreement has been achieved on:

|                                                                                          | Strongly Disagree     | Disagree              | Neutral               | Agree                 | Strongly Agree        |
|------------------------------------------------------------------------------------------|-----------------------|-----------------------|-----------------------|-----------------------|-----------------------|
| Sensory assessment (perception, discrimination, sensation, proprioception, monofilament) | <input type="radio"/> |

## 18. Assessment other

Based on the responses, no consensus was achieved in Round 1, however agreement was achieved (70% of participants agreed) in round 2 on the following assessments:

1. Beighton score \_\_\_\_\_
2. Other observations (syndactyl, skin folds, feet, legs, thighs, tufts) \_\_\_\_\_

The following assessment achieve agreement of 51-69% of participants. Please rate on the following scale your opinion of whether this assessment should be included:

|                  | Strongly Disagree     | Disagree              | Neutral               | Agree                 | Strongly Agree        |
|------------------|-----------------------|-----------------------|-----------------------|-----------------------|-----------------------|
| Toe walking tool | <input type="radio"/> |

## 19. Gait assessment

Based on the responses, consensus and agreement was achieved on the following themes (70% of people identified the following assessments when describing the aspects of the lower limb visualised during gait assessment). Therefore the following gait observations be incorporated into the GALLOP are:

1. Shoulder symmetry (transverse, frontal plane rotation)
2. Arm swing (symmetry, guard position, flapping/flailing)
3. Hip (rotation, frontal plane motion, flexion, hip drop/rise)
4. Knee position (patella, flexion/extension/hyperextension, internal, frontal, external, genu varum/valgum)
5. Heel contact (initial contact, motion, timing, heel lift, rearfoot position)
6. Mid-stance (mid-foot position)
7. Toe off (Forefoot position, propulsion, symmetry, duration)
8. Other gait observations (Trendelenburg, limp, limb circumduction, abductory twist etc)

- 9. Head and neck position
- 10. Trunk/torso position and/or alignment
- 11. Angle of gait (foot progression angle)
- 12. Base of gait

Preferred method of measure: Eyeball/Visual

**The following theme achieved agreement of 51-69% of participants. Please rate on the following scale your opinion of whether this theme should be included considering the current themes that agreement has been achieved on:**

|                  | Strongly Disagree     | Disagree              | Neutral               | Agree                 | Strongly Agree        |
|------------------|-----------------------|-----------------------|-----------------------|-----------------------|-----------------------|
| Length of stride | <input type="radio"/> |

Any comments about any of the above?

Thank you for taking the time to complete this survey. The final round will be emailed to you as soon as possible. Within the final round where there has greater than 70% agreement or less than 50% agreement, a final copy of the statements will be emailed only and the rounds ceased. Only if there is outstanding themes of 51-69% will these be circulated for one final round.

By clicking out of this survey you will not be able to re-enter and your answers will be saved.

If you would like to modify your responses, please use the back button or close and re-enter at a later date. Please remember you only have 2 weeks from this time to complete the survey. Your responses though will not be recorded until you click the button at the end of this question.
